# Supplementary material
Source: publisher figshare collection journal article supplement (https://acs.figshare.com/ndownloader/files/5105119)

# Supporting Information

## **Calix[4]pyrrole Schiff base macrocycles. Novel binucleating ligands for Cu(I) and Cu(II).**

*Jacqueline M. Veauthier, Elisa Tomat, Vincent M. Lynch, and Jonathan L. Sessler\**  
and  
*Utkir Mirsaidov and John T. Markert\**

|                                         | Page |
|-----------------------------------------|------|
| I. Magnetic data for complex <b>4</b> . | S2   |

## I. Magnetic Measurements for complexes **4** and **5**.

**Evans Method.** Solution magnetic measurements were made using the Evans method. Solutions of the metal complex were prepared in CDCl<sub>3</sub> and placed in 5 mm NMR tubes, while pure CDCl<sub>3</sub> was placed in a concentric capillary tubes within the NMR tubes. Calculations of the magnetic moments ( $\mu$ ) were based on the difference in chemical shift observed (400.269 MHz) for the residual CHCl<sub>3</sub> signal in neat solvent and in the solution containing the paramagnetic species.

### **Complex 4**, [C<sub>38</sub>H<sub>32</sub>N<sub>8</sub>)Cu<sup>II</sup><sub>2</sub>].

- 1) Concentration of **4** = 0.0066 M,  $\Delta\delta$  = 19.2129 Hz,  $\mu_{\text{eff}}$  = 2.06  $\mu_B$
- 2) Concentration of **4** = 0.0026 M,  $\Delta\delta$  = 6.8046 Hz,  $\mu_{\text{eff}}$  = 1.95  $\mu_B$

### **Complex 5**, [(C<sub>42</sub>H<sub>40</sub>N<sub>8</sub>O<sub>4</sub>)Cu<sup>II</sup><sub>2</sub>].

- 1) Concentration of **5** = 0.0027 M,  $\Delta\delta$  = 6.8046 Hz,  $\mu_{\text{eff}}$  = 1.92  $\mu_B$
- 2) Concentration of **5** = 0.0032 M,  $\Delta\delta$  = 8.8059 Hz,  $\mu_{\text{eff}}$  = 1.99  $\mu_B$

**SQUID.** Solid State magnetic susceptibilities were measured using a Quantum Design MPMS SQUID system in the temperature range of 4–300 K in a field of 1 kOE. The crystalline sample was placed inside a gelatin capsule. The susceptibility contribution from the capsule was measured separately and subtracted from the data.

### **Complex 3**, [C<sub>38</sub>H<sub>32</sub>N<sub>8</sub>)Cu<sup>II</sup><sub>2</sub>]

The molar magnetic susceptibility data for **3** were fitted to a modified Bleaney-Bowers equation:

$$\chi_{\text{molar}} = (1-p) \frac{2Ng^2\beta^2}{kT} \left( \frac{1}{3 + e^{\frac{-J}{kT}}} \right) + p \frac{2Ng^2\beta^2}{3kT} S(S+1) + \chi_0$$

Where,

p = molar fraction of paramagnetic impurity

N = Avogadro's Number

g = g-factor

$\beta$  = Bohr magneton

k = Boltzmann constant

J = exchange coupling constant

S = spin quantum number

$\chi_0$  = temperature independent susceptibility (sum of a negative contribution from Langevin diamagnetism and a positive contribution from Van Vleck paramagnetism).

A reasonable fit ( $R = \Sigma_i[(\chi_{\text{obs}})_i - (\chi_{\text{calc}})_i]^2 / \Sigma_i(\chi_{\text{obs}})^2 = 0.00037$ ) was obtained using the following parameters:

$$p = 0.0118 \pm 0.0007$$

$$g = 1.9 \pm 0.1$$

$$J = -41.0 \pm 0.2 \text{ cm}^{-1}$$

$$S = \frac{1}{2}$$

$$\chi_0 = 0.00065 \pm 0.00005$$

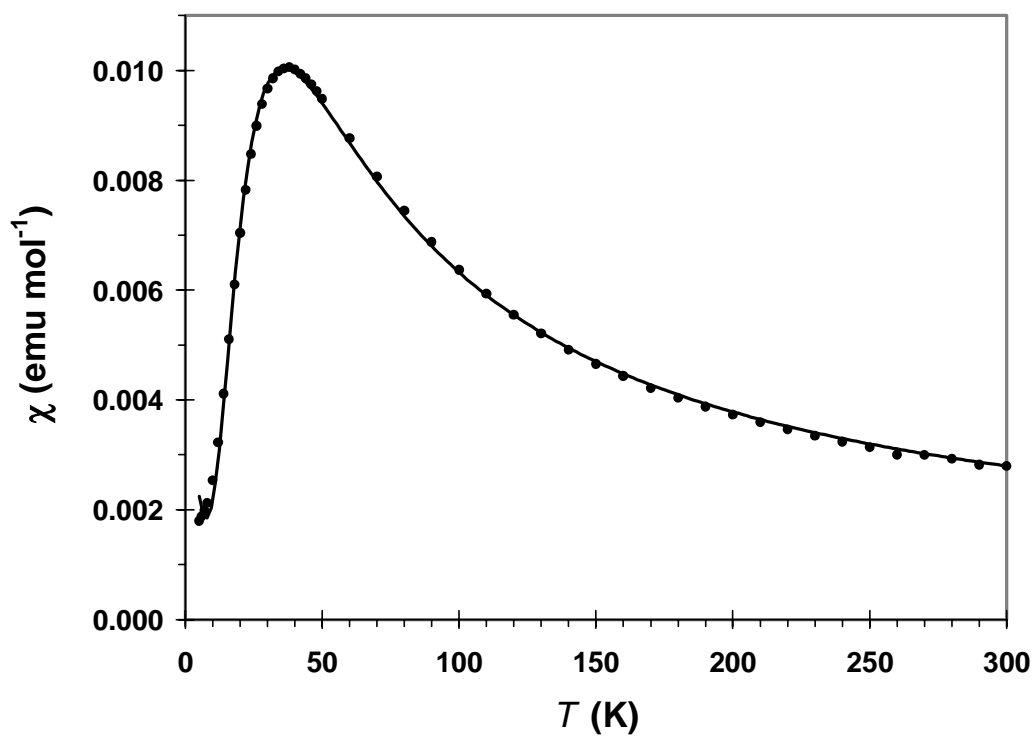

Supplement: Supplementary file 1 [file 5105119]
